# Supplementary material for: Two dimensional PNA/DNA arrays: estimating the helicity of unusual nucleic acid polymersElectronic supplementary information (ESI) available: sequence data, experimental protocols for assembly of the tiles and arrays and gel electrophoresis data demonstrating formation of the tiles. See http://www.rsc.org/suppdata/cc/b4/b401103a/
Source: Royal Society of Chemistry journal article supplement (doi:10.1039/b401103a), 2004-01-01
Supplement: b401103a.pdf [file b401103a.pdf]

## SUPPLEMENTARY INFORMATION, LUKEMAN, MITTAL & SEEMAN

Gel electrophoresis of A and B tiles

### Formation of Hydrogen-Bonded Complexes

Complexes were formed by mixing a stoichiometric quantity (10pmols) of each strand as estimated by  $OD_{260}$ , in 40 mM Tris, 40 mM Acetic Acid, 12.5 mM Magnesium Acetate, and 2 mM EDTA (TAEMg) for a final strand concentration of 1  $\mu$ M. This mixture was cooled over 5 h from 90 °C to room temperature in a 2 L water bath.

### Nondenaturing gels of the A and B tiles .

All gels are 10% acrylamide (19:1 acrylamide:bis), TAEMg (10mM Mg) buffer and run at 25 V/cm, 20 °C. 10pm of each sample are loaded in each lane and after running the gel is stained in an aqueous formamide solution of Stains-All (Sigma). The marker lanes contain 3 $\mu$ g of either a 10bp ladder (USB) or 25bp ladder (USB) annealed in the same buffer system.

**Figure 3** demonstrates the formation of the **Ad** and **Ap** tiles.

Ad 10bp Ad

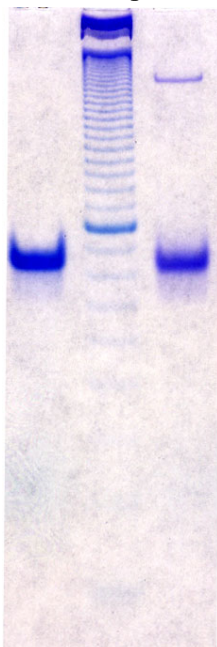

The slower moving band present in the **Ap** lane disappears at lower concentration. However, we use a 1  $\mu$ M initial tile concentration in the arrays (to maximize array size) - we therefore ran a gel under the same concentration conditions.

**Figure 4** shows the formation of sub complexes of **Ap**. This demonstrates that the target band in the **Ap** lane is not one of these sub-complexes. The lanes labeled **Ap-n** contain all the strands present in **Ap** except strand n, where strand n is a strand defined by the nomenclature in the earlier supplementary information. 10bp is a 10-base pair ladder.

10bp **Ap-1** **Ap-2** **Ap-3** **Ad** 10bp **Ap** **Ap-4** **Ap-5**

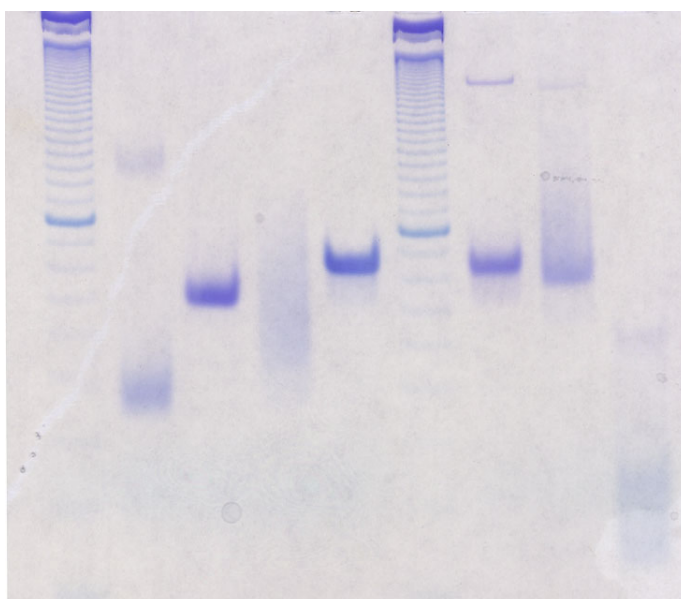

**Figure 5** shows the formation of tiles **B0** through **B8**. 25bp is a 25-base pair ladder.

25bp **B8** **B7** **B6** **B5** **B4** **B3** **B2** **B1** **B0**

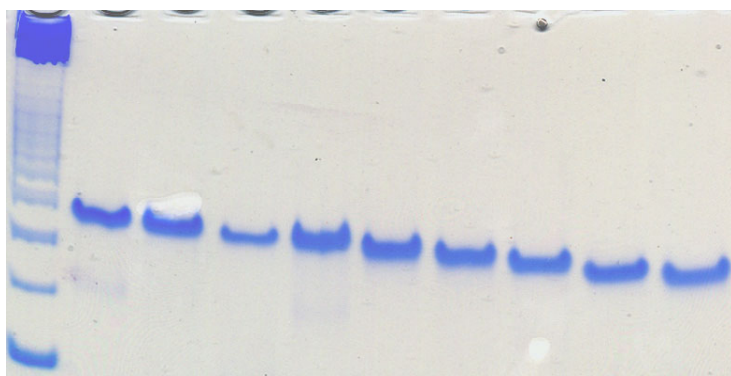

## Sequence information

Each tile consists of 5 strands.

### A tile

The PNA A tile and the DNA A tile are identical except strand A2.2 and A2.4 are made of DNA and PNA respectively.

#### A2.1 (48mer)

GATGGCGACATCCTGCCGCTATGATTACACAGCCTGAGCATTGAC  
ACG

#### A2.2 (15mer)

AATGCTCACCGATCA

#### A2.3 (48mer)

CGACCATGATCGGACGATACTACATGCCAGTTGGACTAACGGCG  
CTAC

#### A2.4 (15mer)

CCGTTAGTGGATGTC

#### A2.5 (42mer)

TGTAGTATCGTGGCTGTGTAATCATAGCGGCACCAACTGGCA

### B tile

Each tile consists of 5 strands.

In all the B tiles, the central strand (B1.5) is the same

#### B1.5 (42mer)

AGTACAACGCCACCGATGCGGTCACTGGTTAGTGGATTGCGT

As one ascends the series, there is an extra base added to one of the sides of the molecule. This means that one of the crossover strands can remain the same as the previous molecule in the series.

### B+ZERO

B2.1 (68mer)  
CGTGCATCATGGACTAACCAGTGCTCGCTGATTTTTTCAGCGAGTT  
ACCGCATCGGACAGCAGCCTGAC

:

B2.2 (37mer)  
GCCATCCGTCGATACGGCACCATGATGCACGGTAGCG

B2.3 (68mer)  
AGTCGCACGACCTGGCGTCTGTTGGCTTTTGCCAACAGTTTGTAC  
TACGCAATCCTGCCGTATCGACG

B2.4 (37mer)  
TGGTCGGTCAGGCTGCTGTGGTCGTGCGACTCGTGTC

### B+ONE

B2.1+ONE (69mer)  
CGTGCATCATGGACTAACCAGTGCTCGCTGATTTTTTCAGCGAGTT  
ACCGCATCGGACAGCAGCCTTGAC

B2.2+ONE=B2.1 (37mer)

B2.3+ONE(69mer)  
AGGTTCGCACGACCTGGCGTCTGTTGGCTTTTGCCAACAGTTTGTAC  
CTACGCAATCCTGCCGTATCGACG

B2.4+ONE(39mer)  
TGGTCGGTCAAGGCTGCTGTGGTCGTGCGACCTCGTGTC

### B+TWO

B2.1+TWO (70mer)

Supplementary Material (ESI) for Chemical Communications  
This journal is © The Royal Society of Chemistry 2004

CGTGCAGTCATGGACTAACCAGTGCTCGCTGATTTTTTCAGCGAGT  
TACCGCATCGGACAGCAGCCCTGAC

B2.2+TWO (39mer)

GCCATCCGTCGAATACGGCACCATGACTGCACGGTAGCG

B2.3+TWO(70mer)

AGTCGCAACGACCTGGCGTCTGTTGGCTTTTGCCAACAGTTTGTA  
CTACGCAATCCTGCCGTATTCTGACG

B2.4+TWO(39mer)

TGGTCCGGTCAGGGCTGCTGTGGTCGTTGCGACTCGTGTC

B+THREE

PNAB2.1+THREE (71mer)

CGTGACAGTCATGGACTAACCAGTGCTCGCTGATTTTTTCAGCGAG  
TTACCGCATCGGACAGCAGCCCTGAC

PNAB2.2+THREE(41mer)

GCCATCCGTCAGAATACGGCACCATGACTGTCACGGTAGCG

PNAB2.3+THREE(71mer)

AGTCGCAACGACCTGGCGTCTGTTGGCTTTTGCCAACAGTTTGTA  
CTACGCAATCCTGCCGTATTCTGACG

B2.4+THREE= B2.4+TWO

B+FOUR

PNAB2.1+FOUR (72mer)

CGTGACAGTCATGGACTAACCAGTGCTCGCTGATTTTTTCAGCGAG  
TTACCGCATCGGACAGCAGCCCCTGAC

B2.2+FOUR = B2.2+THREE

PNAB2.3+FOUR (72mer)

Supplementary Material (ESI) for Chemical Communications  
This journal is © The Royal Society of Chemistry 2004

AGTCCGCAACGACCTGGCGTCTGTTGGCTTTTGCCAACAGTTTGT  
ACTACGCAATCCTGCCGTATTCTGACG

PNAB2.4+FOUR (41mer)

TGGTCGGTCAGGGGCTGCTGTGGTCGTTGCCGGACTCGTGTC

### B+FIVE

B2.1+FIVE (73mer)

CGTGACAGTCATGGACTAACCAGTGCTCGCTGATTTTTTCAGCGAG  
TTACCGCATCGGACAGCAGCCACCTGAC

B2.2+FIVE SAME AS AS B2.2+FOUR

B2.3+FIVE (73 mer)

AGTCCGGCAACGACCTGGCGTCTGTTGGCTTTTGCCAACAGTTTG  
TACTACGCAATCCTGCCGTATTCTGACG

B2.4+FIVE (43mer)

TGGTCGGTCAGGTGGCTGCTGTGGTCGTTGCCGGACTCGTGTC

### B+SIX

PNAB2.1+SIX (74mer)

CGTGACAAGTCATGGACTAACCAGTGCTCGCTGATTTTTTCAGCGA  
GTTACCGCATCGGACAGCAGCCACCTGAC

PNAB2.2+SIX (43mer)

GCCATCCGTCAGAATACAGGCACCATGACTTGTCACGGTAGCG

B2.3+SIX (74mer)

AGTCCGGCAACGACCTGGCGTCTGTTGGCTTTTGCCAACAGTTTG  
TACTACGCAATCCTGCCTGTATTCTGACG

B2.4+SIX = B2.4+FIVE

### B+SEVEN

Supplementary Material (ESI) for Chemical Communications  
This journal is © The Royal Society of Chemistry 2004

PNAB2.1+SEVEN (75mer)

CGTTGACAAGTCATGGACTAACCAGTGCTCGCTGATTTTTCAGCG  
AGTTACCGCATCGGACAGCAGCCACCTGAC

PNAB2.2+SEVEN (45mer)

GCCATCCGTTTCAGAATACAGGCACCATGACTTGTCAACGGTAGCG

PNAB2.3+SEVEN (75mer)

AGTCCGGCAACGACCTGGCGTCTGTTGGCTTTTGCCAACAGTTTG  
TACTACGCAATCCTGCCTGTATTCTGAACG

B2.4+SEVEN = B2.4+SIX

B+EIGHT

PNAB2.1+EIGHT (76mer)

CGTTGACAAGTCATGGACTAACCAGTGCTCGCTGATTTTTCAGCG  
AGTTACCGCATCGGACAGCAGCCACTCTGAC

PNAB2.2+EIGHT=PNAB2.2+SEVEN

PNAB2.3+EIGHT (76mer)

AGTCCTGGCAACGACCTGGCGTCTGTTGGCTTTTGCCAACAGTTT  
GTACTACGCAATCCTGCCTGTATTCTGAACG

PNAB2.4+EIGHT (45mer)

TGGTCCGGTCAGAGTGGCTGCTGTGGTCCGTTGCCAGGACTCGTGTC
